# Supplementary material for: Commonality of Virulence-Promoting Function in Rhodococcus equi Virulence Associated Proteins (Vaps)
Source: Hindawi journal article supplement (doi:10.1155/2023/9141112), 2023-10-10
Supplement: f1 [file 9141112.f1.docx]

**Supplemental Data**

# **Figure S1.Vap sequences**

Vap Protein sequences used for alignment. Full length sequences are shown with N-terminal domains represented by amino acids in bold and the ‘core’ domains in normal text.

> Q9EUL9; VapA

**MKTLHKTVSKAIAATAVAAAAAMIPAGCANATVLDSGSSSAILNSGAGSGIVGSGSYDSSTTSLNLQKDEPNGRASDT**AGQEQQYDVHGDVISAVVYQRFHVFGPEGKVFDGDAGGLTLPGAGAFWGTLFTNDLQRLYKDTVSFQYNAVGPYLNINFFDSSGSFLGHIQSGGVSTVVGVGGGSGSWHNA

>B4F366; VapB

**MMKALHKTVSRAIAAIATAAAAVLAVAPASVANAAVLDSGGGSALLKDGAGSGEVGSQAYDSSTVSSNLQKAETNGPVGLAGT**AEQEQQYDVHGNVISAAVYQKFHVYGPEDMVFDGDAGGLTIPGAGAFWGTLFTSDLQRLYKDTVSFQYNALGTYLNINFFDSSGGFLGHIQAGAVSAVVGVGGGSGSWHNWEVA

>Q9Z5Z0; VapC

**MFRVGRPSKSIAVVASVLCFLALGGTARANVVAPSAWGGAQSAADKEGEGVTLGGVGVLRPHN**KDADEQYTVHGVVVSALFYNHLRISVDGGMTFDGDGGGLSTPGGGALWGTLTTSDLQQLYDETASFECNAVGPYLNINFYDSYGRILASVQAGGVSTMIGIGGGNGRWHLVL

>Q9Z5Y9; VapD

**MVRARAFGRLFTFLLAVAVIATVSMGGANAQELAGTKTSDAALLSGNKAA**IPEDKEYDVSGRVVSALVYQYFIVTVDDAEDKKGKTFQGDAGGVAIPGVDFFWGTLHTPDLEKLYSDTVSFQYNAAATFLNINFFDSKGERLGYVLAGAAGTVSGIGGGTGGWE

>D9I5S4; VapE

**MRLPFARTAVALVLIALTIVAAPTGIAGAREIGAQAWPASQLESGLAVSGNPVGVHDVRMAVHDDSTHTREFKE**DDSEKQYPVHGFASSFIFYQTVSIIIDDDGRGGPGKTFEGEAGGITTPGAAGYAGVLFTSDLERLYRETVSFEYNAVGPYLNINLFAGDGGLLGHVQSGAISSLVGIGGGTGAWR

>Q9EU62; VapG

**MSVRTLLAATLVAGISVLAPAGIANAETSMVSTTAASSVEHAANTYDFAEAKSGSSIPAK**

**VA**AEQANSYSVHGLVTSLAVYQHFSLTVEGGGKTFTGDSGGISIPGVAVLEGTLFTEDLQHLYSDTVSFEYNAVGPYLNINFFDSHGTLLGHVQSGSIGTVSGIGGGTGGWQ

>Q9ETW8; VapH

**MNLSKTTRKFLSRTAVPATFVMALTVPWGCAAPPPLPDGPTHDLPTWREEGANYSDGTMLVRASSNFLEPSTHS**DSGQQQWTVQGVLASALVYQRLKLNVEGGETFEGYAGGLSFPGGAMVWGTLFTDNIQRLYDRTESFEFNAVGPYLNVNFFDGHSAILGHAQLGGVSSVIGIGGGTGTWIGDVA

>B4F362; VapL

**MRPQSSYRPYVRAIFAAALVAGISILGATGVVNAETSMASNAATSTVHRVAKTCDSNLSENDHSSAETNGQLSFATEAT**AEQGYTYSVHGLVTSLAVYQHFSLTVEDDGKTFTGDSGGISVPGVAVLKGTLFTEDLQRLYNDTVSFQYNAVGPYMNINFFDSHSTLLGHVQSGSIGTLTGIGGGTGGWR

>B4F360; VapK1

**MGNARRSWVKAAAAATLTAAAVMVPAGLANAQPLDVGGSSTVVANDAFGSVSLGGHGSSGYGSSSDYGSSSDYDGSGSGFGTAPDVRSQVAAS**LDEEQQYDVKGDVWSALVYQQFHVEGPQGKVFDGQAGGLTIPGAGAFWGTLFTSDLNRLYADTSSFQYNAVGPYLNINFFDGNGVLLGHIQAGAVSTVTGVGGGTGSWS

>A0A0F7IDX3; VapN

**MGNARRSLVKAAAASTLTAAAVMVPAGVANAQPLDVGGSSTIFVNDAFGSASMGDHGSSSSAPETAPKVRSQAA**ANQEQRYDVKGNVISAIFYQQFRVEGPQGKVFDGQAGGVTIPGGGAFWGSLFTGDLNRLYSDTASFEYNALGPYLNINFFDKNGVLLGHIQAGAVSSVVGVGGGTGSWA

>B4F357; VapJ

**MNLAHVTRKFLVSTAVPVTLVIAFAAPFQFSAPLASAATSDLSIRRDGSAHYSDSTLSLR**

**ASSDSPEPTTH**GAQQQWAVHGVLASALVYQLLTLTVDGGEQFQGYAGGVSFPGGAAVWGTLFTDDIQRLYDQTASFQFNAVGPYLNVNFFDRHGTLLGHAQLGGVSSVIGIGGGSGTWTGDVA

>B4F364; VapM

**MIRTVVGWGAFVLAFSILATGAAYAHAQELEPGGSFSEGILQRNFPLEGEFASVSEPGSGNVSASK**VGEESNFAVRGVVVSALFYQHLEITVSGGETFDGDGGGLSVPGGGALWGTLFTRDLQRLYDETVSFEFNAAGLFVNVNFFDKDGILLGHVESGAVSTAVGIGGGTGRWHIV

>A0A0F6WFR3; VapS

**MSRMGRPSKVATVVAGALCLLPLGGTVRAEVVAPSVRDGLQSAHSKEAEGVTLGGVVVPRPLNT**DSDEQYSVHGVVVSAVFYNYVRISVDGGMTFDGEGGGLSTPGGGAFWGTLATSDLQQLYDETVSFECNGVGPYLNIKFYDSYGSILGSVQAGGVSTMIGIGGGNGRWHVV

>A0A0F7ICF4; VapR

**MTIEGRCSKGNKMKAVRKTVSKSIAATVAVATVAAIPAGVVNAAVLDSGVDIMLSKNPALRAPELKN**SDSEQQYPVHGFAASFIFYQTVSILIDDDGRGRAGRTFEGEAGGITTPGAAGFVGVLFTSDLERLYRETVSFEYNAVGPYLNINLFAGDGSLLGHVQSGAISILVGIGGGNGT

WL

>A0A0F6WFT5; VapO

**MNVRTFLAATLVAGISFLGPTGLANAETPTVSSTAASSVGRAANTCGSGCAEKSYVSAEAKGGPTIATKAT**AERENTYSVHGLVTSLAVYQHFSVTVEDGGKTFTGDSGGISIPGVAVLKGTLFTDDLQRLYNDTVSFEYNAVGPYMNINFFDSHGTLLGHVQSGSIGTLTGIGGGTGWQ

>A0A0F7ICF0; VapP

**MYLSQPARKFLVRTAVPVTIVMALAVPRGCAPPPPLPAAPIQDPSAPTHDPRVGPANYSDGTVLVRASSNIPEPVIRSV**SEQQQWTVNGVLASALVYQRLTLTVEGGEKFEGYAGGLSIPGAGIVWGTLFTDDIQRLYDGTESFEFNAVGPYLNVNFFDGRSTLLGHAQLGGVSSVIGIGGGTGTWKG

# **Figure S2. Vap-induced cell death**

J774.2 Cell viability after incubation with varying concentrations of Vaps for 20 h. Cell viability was measured using a Beckman Coulter Vi-Cell.

**
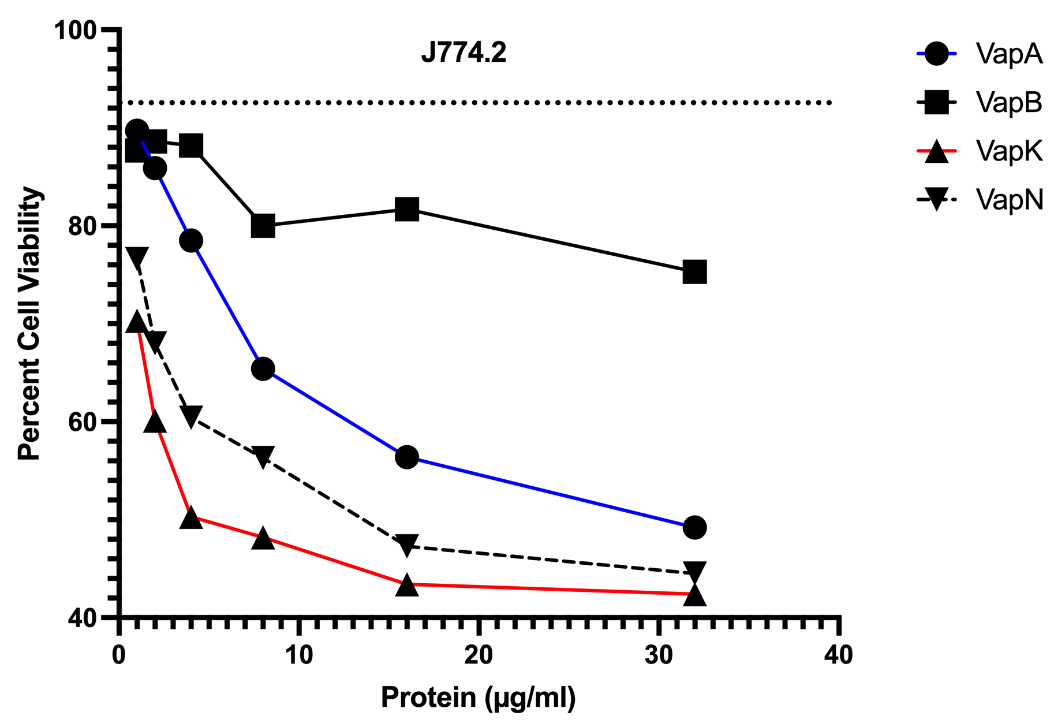
**

# **Figure S3. pH Calibration curves**

**A** Typical calibration curve for ratiometric imaging of fluorescein at pH 4.5-7.5. **B** Typical calibration curve for ratiometric imaging of pHluorin-2 at pH 4.5-7.5.


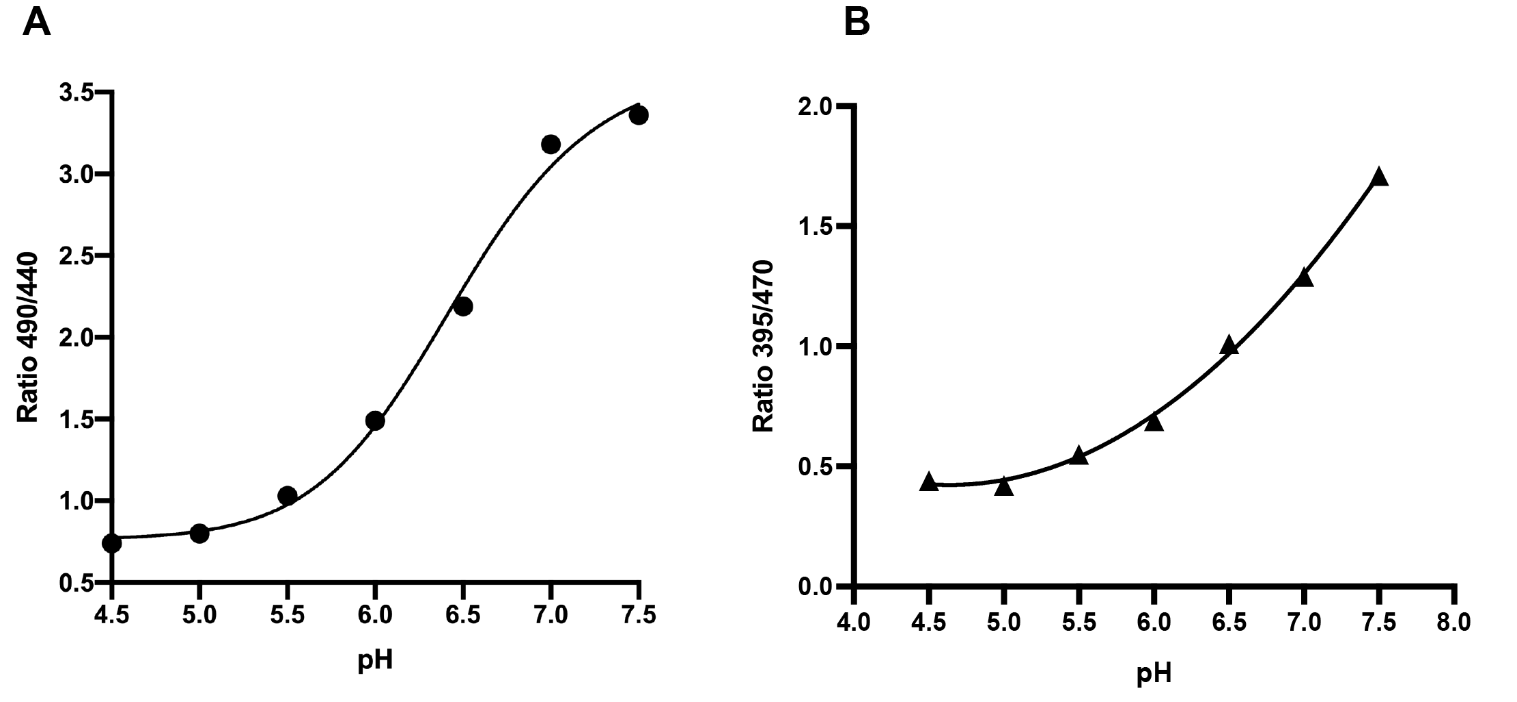


# **Movie S1**

Live cell imaging - NRK cells expressing lgp120-GFP (a gift from Paul Luzio) were seeded into glass bottom petri dishes and incubated overnight at 37°C in 5% CO2. The following day, cells were incubated with VapA core at 40 µg/mL. For fluorescence imaging, 1 h before the start of imaging cells were put into a heated CO2 chamber in a Zeiss LSM 780 Multiphoton microscope to equilibrate. Images were taken at 3 min intervals for 23 h after equilibration and processed with Zen (Zeiss).

Video can be found: <https://drive.google.com/file/d/1-CPveM2WSDIN7ELCFM_x5ylVyr1o7pGT/view?usp=sharing>

# **Figure S4 VapA-swollen LGP120-positive compartments are still fusogenic**

Stills of Movie S1. **A** Selected images of LGP-120-GFP in NRK cells (up to 12.5 h) in control cells and cells incubated with VapA. Swollen compartments can be seen by 4 h. **B** Magnification of cells labelled (in panel A). Arrows indicate fusion of swollen compartments.

# **Figure S5 VapA does not localise to the limiting membrane of swollen endolysosomal compartments.** NRK cells were incubated with 5 µg/ml recombinant VapA-GFP protein for 20h. Cells were fixed and the lysosomes immunolabelled with an anti-LGP120 monoclonal antibody, followed by an Alexa Fluor 555-labelled secondary antibody (red). Scale bar = 10 µm. A single image is shown of part of a cell with a swollen LGP-120 compartment containing VapA-GFP. The image was acquired using a LSM980 confocal microscope with ZEISS Airyscan joint deconvolution processing.
